# Supplementary material for: Rapid host strain improvement by in vivo rearrangement of a synthetic yeast chromosome
Source: PubMed Central journal article supplement (PMC5964169; doi:10.1038/s41467-018-03143-w), 2018-05-22
Supplement: 41467_2018_3143_MOESM3_ESM.pdf [file 41467_2018_3143_MOESM3_ESM.pdf]

## **Description of Additional Supplementary Files**

File Name: Supplementary Data 1

Description: This file contains annotated Genbank files for all plasmids generated in this study
